# Supplementary material for: A slowly cleaved viral signal peptide acts as a protein-integral immune evasion domain
Source: PubMed Central journal article supplement (PMC8024260; doi:10.1038/s41467-021-21983-x), 2021-04-06
Supplement: 41467_2021_21983_MOESM3_ESM.pdf [file 41467_2021_21983_MOESM3_ESM.pdf]

### **Description of Additional Supplementary Files**

File Name: Supplementary Data 1

Description: Mass spectrometry data of SP+ US9, associated with Fig. 1.

File Name: Supplementary Data 2

Description: Mass spectrometry data of SP- US9, associated with Fig. 1.

File Name: Supplementary Data 3

Description: Mass spectrometry data of  $\Delta$ Ig US9, associated with Fig. S2.

File Name: Supplementary Data 4

Description: Mass spectrometry data of  $\Delta$ Ser US9, associated with Fig. S2.

File Name: Supplementary Data 5

Description: Mass spectrometry data of  $\Delta$ N-Ser US9, associated with Fig. S2.

File Name: Supplementary Data 6

Description: Mass spectrometry data of SEL1L, associated with Fig. 6.
